# Supplementary material for: Understanding high wintertime ozone pollution events in an oil- and natural gas-producing region of the western US
Source: Copernicus journal article supplement (doi:10.5194/acp-15-411-2015), 2015-01-14
Supplement: Supplementary file 1 [file acp-15-411-2015-supplement.pdf]

Supplement of Atmos. Chem. Phys., 15, 411–429, 2015  
<http://www.atmos-chem-phys.net/15/411/2015/>  
doi:10.5194/acp-15-411-2015-supplement  
© Author(s) 2015. CC Attribution 3.0 License.

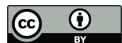

*Supplement of*

## **Understanding high wintertime ozone pollution events in an oil- and natural gas-producing region of the western US**

**R. Ahmadov et al.**

*Correspondence to:* R. Ahmadov (ravan.ahmadov@noaa.gov)

# Understanding high wintertime ozone pollution events in an oil and natural gas producing region of the western U.S.

## *Supplemental Information*

### **1 Regression slopes in the top-down inventory**

Details of the measurements of NO<sub>y</sub> and the various VOCs during the winters of 2012 and 2013 at the Horse Pool site are presented in Edwards et al. (2013) and (2014) and the report available at: <http://www.deq.utah.gov/locations/U/uintahbasin/studies/UBOS-2013.htm>. Most VOC species were determined by GC-MS in 2012, and GC-FID in 2013 as in Gilman et al. (2013). Aromatics and formaldehyde were determined by PTR-MS in both years (de Gouw and Warneke, 2007; Warneke et al., 2011). During 2012 one-minute average NO<sub>y</sub> data were determined by catalytic conversion of NO<sub>y</sub> over heated gold and chemiluminescence detection of NO (Williams et al., 2009), and in 2013 it was determined by molybdenum conversion and cavity ringdown detection of NO<sub>2</sub> as described in Wild et al. (2014). One minute average CH<sub>4</sub> was determined using a 3-channel Picarro instrument (Peischl et al., 2012).

Linear regressions of NO<sub>y</sub> and VOCs with CH<sub>4</sub> are windowed between the hours of 10:00 and 16:00 MST to capture regionally representative conditions within the daytime boundary layers and minimize effects from isolated plumes observed under more stable conditions. Half-hourly resolution VOCs data from both years are included in the regressions. Table S1 summarizes the linear regressions and slopes with respect to CH<sub>4</sub>. VOC emissions are dominated by light alkanes on a molar basis with higher correlations ( $r^2 > 0.85$ ) for primary VOCs, and lower correlations for secondary, oxygenated VOCs. The table also gives the recommended assignment of each VOC into the Statewide Air Pollution Research Center (SAPRC-07) photochemical mechanism (Carter, 2010) or the RACM mechanism (Stockwell et al., 1997), which is a basis for the mechanism used in this study. The same lumped hydrocarbon and oxygenated VOC species are emitted in both emission scenarios.

### **2 Comparison of the meteorological simulations**

28 Figure S3a, b and c show averaged diurnal time series for meteorological variables –  
29 temperature, moisture and wind speed measured at Horse Pool during the evaluation time period  
30 29 January–8 February 2013. We also show the wind roses for the same time period for both  
31 measurements and model in Fig. S4. The wind roses are provided separately for the nighttime  
32 (00:00 – 06:00 MST) and afternoon (12:00 – 18:00 MST) hours to highlight the changes in the  
33 wind fields from the night to the afternoon hours at Horse Pool. The wind speed is reasonably  
34 well simulated during the daytime (Fig. S3c). However, at nights the model shows stronger  
35 easterly winds, whereas the observations indicate lighter winds mostly from east and north-east.  
36 The comparisons also show that WRF captures the cold pool conditions with  $\sim 2$  °C bias during  
37 daytime at Horse Pool (Figure S3a). The stronger katabatic flows at night in the model could be  
38 due to the cold temperature bias in the model (Figure S3a and c). It should be noted that as  
39 Figure S3c and Figure S4 show, the measured wind speeds at Horse Pool during the  
40 stagnation meteorological conditions were quite low.

41 We also compared PBL height estimates from the model and the observations in order to assess  
42 the model’s ability to simulate the cold pool and vertical mixing. Using tether sonde  
43 measurements of temperature and relative humidity at 3 locations conducted by the NOAA  
44 Global Monitoring Division between 29 January and 8 February 2013, PBL heights were  
45 estimated from the vertical gradient of virtual potential temperature. The same method was  
46 applied to the model output at corresponding times and locations. The results are shown in Fig.  
47 S5. The majority of the daytime (09:00-17:00 MST) PBL height values fall within the range of  
48 50-200 m, with a median of all the measurements of 110 m. Although the model simulates the  
49 observed range of the mixed layer depth, it has difficulty in capturing the timing of growth and  
50 collapse of the PBL observed within the UB (Fig. S5).

51

### 52 **3 Time series of observed and model $\text{NO}_y$ , $\text{CH}_4$ and toluene for 2013**

53 Figure S6a, b and c show the time series of observed and model simulated  $\text{NO}_y$ ,  $\text{CH}_4$  and toluene  
54 at Horse Pool during the time period 29 January–22 February 2013.  $\text{NO}_y$  measurements began  
55 after February 4 2013, and the 3 model cases are the same as those shown for  $\text{O}_3$  in Fig. 3a and b  
56 of the main text. The model case without oil and gas emissions shows negligible toluene and

57 CH<sub>4</sub> above background specifications, but a noticeable contribution from sources other than the  
58 oil and gas sector for NO<sub>y</sub>. As discussed in more detail within the main text, on average 57% of  
59 the non-oil/gas sector NO<sub>y</sub> can be attributed to the mobile sectors of Vernal and Roosevelt, Utah,  
60 and surrounding population, with the remaining attributed to the Bonanza power plant. For the  
61 top-down and bottom-up emission cases, biases for all three species are apparent, and  
62 summarized within Table 3b of the main text. The simulation using the top-down emission case  
63 is in better qualitative and quantitative agreement with the observations.

64 It is important to note that the top-down inventory assumes emissions are constant throughout a  
65 diurnal cycle, while the bottom-up NEI-2011 emissions uses diurnal profiles assigned to each  
66 SCC (source classification code) contributing to the emissions (version 1 modeling platform,  
67 amptpro\_for\_2011\_platform\_with\_carb\_mobile\_2011CEM\_moves\_13aug2013\_v0). The UB  
68 oil/gas sector non-point inventory has about 20 SCC categories contributing to primary  
69 emissions, but a single diurnal profile common to all the major source types. This cycle has a  
70 minimum (44% of diurnal average) between 02:00 and 03:00 MST, and a maximum (152% of  
71 average) between 14:00 and 15:00 MST. As best shown in Figure S6, all primary emitted species  
72 in the bottom-up inventory show a regular peak occurring between 16:00 and 18:00 MST, and a  
73 minimum typically occurring between 03:00 am and 06:00 MST. The sharp decrease in primary  
74 species for the bottom-up emission scenario mimics the diurnal pattern of O<sub>3</sub> predicted in the  
75 top-down emission scenario (main text, Figure 3b). In both cases the model effectively  
76 transports Basin wide accumulations down the Green River valley floor, with the compensating  
77 katabatic circulation bringing in diluted and cleaner air to the Horse Pool site from up-wind. For  
78 the primary emitted species in the top-down emission scenario (with constant diurnal profile) the  
79 effect of nighttime dilution on the diurnal profile is significantly reduced but still apparent.

80

81 Table S1. Linear regression slope (ppbv/ppmv), standard deviation of fit (StDv (ppbv/ppmv)),  $r^2$   
 82 correlation coefficient, VOC species assignments to the SAPRC-07 and RACM chemical  
 83 mechanisms for 10:00–16:00 MST observations at Horse Pool during the winters of 2012 and  
 84 2013.

| Chemical species        | Slope | StDv | $r^2$ | SAPRC-07 VOC assignment | RACM VOC assignment |
|-------------------------|-------|------|-------|-------------------------|---------------------|
| NO <sub>y</sub>         | 3.026 | 0.56 | 0.6   | -                       | -                   |
| Ethane                  | 57.87 | 1.02 | 0.9   | ALK1                    | ETH                 |
| Propane                 | 26.47 | 0.38 | 0.9   | ALK2                    | 0.519*HC3           |
| Methanol                | 9.152 | 1.67 | 0.3   | MEOH                    | 0.402*HC3           |
| n-butane                | 8.902 | 0.23 | 0.9   | ALK3                    | 1.11*HC3            |
| i-butane                | 5.861 | 0.16 | 0.9   | ALK3                    | 1.11*HC3            |
| i-pentane               | 3.897 | 0.11 | 0.9   | ALK4                    | 0.964*HC5           |
| n-pentane               | 3.532 | 0.17 | 0.9   | ALK4                    | 0.964*HC5           |
| 2 and 3 methylpentane   | 2.942 | 0.21 | 0.8   | ALK4                    | HC5                 |
| 1-methyl cyclohexane    | 2.091 | 0.03 | 0.9   | ALK5                    | HC8                 |
| n-hexane                | 1.613 | 0.06 | 0.9   | ALK4                    | 0.17*HC5+0.83*HC8   |
| Acetone                 | 1.541 | 0.25 | 0.7   | ACET                    | 0.253*KET           |
| Cyclohexane             | 1.178 | 0.01 | 0.9   | ALK5                    | HC8                 |
| 1-methyl cyclopentane   | 0.966 | 0.02 | 0.9   | ALK4                    | 0.956*HC5           |
| 2,2 dimethylbutane      | 0.863 | 0.68 | 0.1   | ALK3                    | 0.964*HC3           |
| Acetaldehyde            | 0.861 | 0.11 | 0.7   | CCHO                    | ALD                 |
| n-heptane               | 0.807 | 0.06 | 0.8   | ALK4                    | HC5                 |
| Toluene                 | 0.758 | 0.03 | 0.9   | ARO1                    | TOL                 |
| Formaldehyde            | 0.638 | 0.06 | 0.8   | HCHO                    | HCHO                |
| Benzene                 | 0.593 | 0.00 | 0.9   | 0.295*ARO1              | 0.293*TOL           |
| MEK                     | 0.568 | 0.09 | 0.7   | MEK                     | KET                 |
| n-octane                | 0.548 | 0.02 | 0.9   | ALK5                    | 0.945*HC8           |
| 1,3 dimethylcyclohexane | 0.386 | 0.01 | 0.9   | ALK5                    | HC8                 |
| Ethylene                | 0.353 | 0.02 | 0.8   | ETHE                    | OL2                 |
| C8 aromatics            | 0.349 | 0.02 | 0.8   | ARO2                    | XYL                 |
| n-nonane                | 0.216 | 0.01 | 0.8   | ALK5                    | HC8                 |
| Ethanol                 | 0.161 | 0.09 | 0.2   | ALK3                    | 1.198*HC3           |
| Acetylene               | 0.146 | 0.06 | 0.4   | ALK2                    | 0.343*HC3           |
| 1,1,3 trimethylhexane   | 0.086 | 0.01 | 0.7   | ALK5                    | HC8                 |
| 2,2 dimethylpropane     | 0.085 | 0.02 | 0.5   | ALK2                    | 0.44*HC3            |
| 1,2 dimethylcyclohexane | 0.078 | 0.00 | 0.9   | ALK5                    | HC8                 |
| n-decane                | 0.075 | 0.00 | 0.8   | ALK5                    | HC8                 |
| C9 aromatics            | 0.071 | 0.01 | 0.7   | .0879*ARO1+.9121*A      | .0879*TOL+.9121XY   |
| 2,2 dimethylbutane      | 0.059 | 0.00 | 0.9   | ALK3                    | 0.964*HC8           |
| Propanal                | 0.057 | 0.01 | 0.5   | RCHO                    | ALD                 |
| Ethylbenzene            | 0.051 | 0.00 | 0.9   | ARO1                    | TOL                 |

|                         |       |      |     |                   |                   |
|-------------------------|-------|------|-----|-------------------|-------------------|
| Ethylcyclohexane        | 0.049 | 0.00 | 0.9 | ALK5              | HC8               |
| n-undecane              | 0.046 | 0.00 | 0.8 | ALK5              | HC8               |
| 1,3 dimethylcyclohexane | 0.043 | 0.00 | 0.9 | ALK5              | HC8               |
| 1,2,4 trimethylbenzene  | 0.040 | 0.00 | 0.8 | ARO2              | XYL               |
| Furan                   | 0.035 | 0.03 | 0.0 | ARO2              | XYL               |
| 1,3,5 trimethylbenzene  | 0.030 | 0.00 | 0.8 | ARO2              | XYL               |
| Naphthalene             | 0.030 | 0.00 | 0.5 | ARO2              | XYL               |
| Propylene               | 0.028 | 0.00 | 0.7 | OLE1              | OLT               |
| 1-eth,3,4-methylbenzene | 0.023 | 0.00 | 0.8 | ARO2              | XYL               |
| C10 aromatics           | 0.014 | 0.00 | 0.7 | .061*ARO1+.939*AR | .061*TOL+.939*XY  |
| Hexanal                 | 0.013 | 0.00 | 0.3 | RCHO              | ALD               |
| 1,2,3 trimethylbenzene  | 0.012 | 0.00 | 0.8 | ARO2              | XYL               |
| Butanal                 | 0.009 | 0.00 | 0.5 | RCHO              | ALD               |
| n-propylbenzene         | 0.007 | 0.00 | 0.8 | ARO1              | TOL               |
| C11 aromatics           | 0.006 | 0.00 | 0.6 | .0246*ARO1+.975*A | .0246*TOL+.939*XY |
| i-propylbenzene         | 0.005 | 0.00 | 0.9 | ARO1              | TOL               |
| 1-eth, 2-methylbenzene  | 0.005 | 0.00 | 0.8 | ARO2              | XYL               |
| Benzaldehyde            | 0.004 | 0.00 | 0.7 | BALD              | ALD               |
| Methacrolein            | 0.004 | 0.00 | 0.4 | MACR              | MACR              |
| MVK                     | 0.004 | 0.00 | 0.7 | MVK               | 0.5*KET+0.5*OLT   |
| C12 aromatics           | 0.003 | 0.00 | 0.4 | ARO2              | XYL               |
| 1,3 butadiene           | 0.002 | 0.00 | 0.6 | OLE2              | OLI               |
| Vinylbenzene            | 0.002 | 0.00 | 0.1 | OLE2              | TOL               |
| Isoprene                | 0.000 | 0.02 | 0.0 | ISOP              | ISO               |

85

86

87

88

89

90

91

92 Table S2. WRF-Chem model configuration. Full description of the model options can be found  
93 in: [http://www2.mmm.ucar.edu/wrf/users/docs/user\\_guide\\_V3/contents.html](http://www2.mmm.ucar.edu/wrf/users/docs/user_guide_V3/contents.html) and  
94 [http://ruc.noaa.gov/wrf/WG11/Users\\_guide.pdf](http://ruc.noaa.gov/wrf/WG11/Users_guide.pdf).

|                                         |                                                               |
|-----------------------------------------|---------------------------------------------------------------|
| Horizontal resolution                   | 12 and 4 km nested domains                                    |
| Vertical resolution                     | 60 layers (18 within lowest 500 m)                            |
| Meteorological input                    | North American Mesoscale analysis                             |
| Surface layer                           | Mellor–Yamada–Nakanishi–Niino                                 |
| Planetary boundary layer                | Mellor–Yamada–Nakanishi–Niino level 2.5                       |
| Land Surface                            | Noah Land Surface Model                                       |
| Microphysics                            | WRF Single-Moment 5-class                                     |
| Shortwave and longwave radiation        | rapid radiative transfer model for general circulation models |
| Gas-phase chemistry                     | RACM_ESRL                                                     |
| Transport of species                    | advection and vertical mixing                                 |
| Advection option for chemical variables | Monotonic                                                     |

95  
96  
97  
98  
99  
100  
101  
102  
103  
104

105 Table S3. Statistics for the observed and simulated meteorological variables at Horse Pool,  
 106 during daytime (09:00 – 17:00 MST) for the two UBWOS campaigns. N- number of used hourly  
 107 observations, MO – median of observations, *r*- Pearson correlation coefficient, MB – median  
 108 model-observation bias, RMSE – root mean square error.

| Time period                        | Variable        | N   | MO        | <i>r</i> | MB         | RMSE      |
|------------------------------------|-----------------|-----|-----------|----------|------------|-----------|
| January 31-<br>February 28<br>2012 | Air Temperature | 261 | 3.27 °C   | 0.83     | -1.66      | 2.40      |
|                                    | Moisture        | 261 | 2.45 g/kg | 0.83     | 0.31 g/kg  | 0.59 g/kg |
|                                    | Wind speed      | 261 | 1.60 m/s  | 0.82     | 0.59       | 1.89      |
| January 29-<br>February 22<br>2013 | Air Temperature | 225 | -6.87 °C  | 0.57     | 0.15 °C    | 2.93 °C   |
|                                    | Moisture        | 225 | 2.18 g/kg | 0.37     | -0.07 g/kg | 0.55 g/kg |
|                                    | Wind speed      | 225 | 1.21 m/s  | 0.15     | 0.00 m/s   | 0.89 m/s  |

109  
 110  
 111  
 112  
 113  
 114  
 115  
 116  
 117  
 118  
 119  
 120  
 121



122 Figure S1. Terrain distribution in nested WRF-Chem grids; (a) 12 km and (b) 4km resolution  
123 domains.

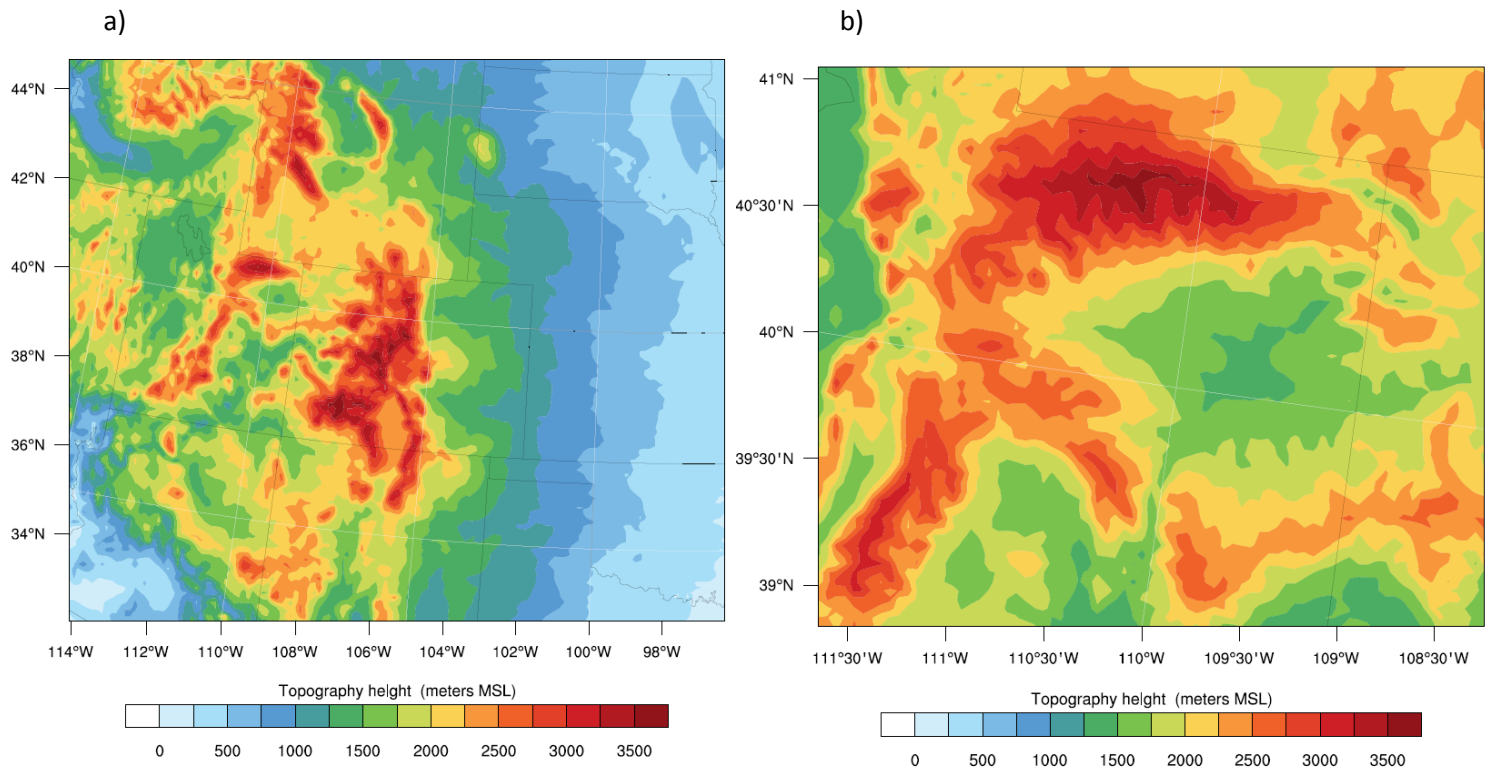

124

125

126

127

128

129 Figure S2. Weather maps from NOAA/HPC (<http://www.hpc.ncep.noaa.gov>); a) frontal passage,  
130 14:00 MST, 28 January 2013; b) stagnation episode, 14:00 MST, 5 February 2013;

131 a)

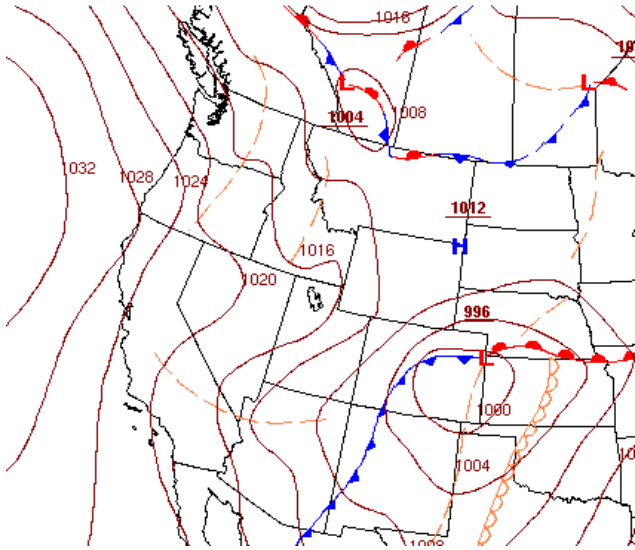

132

b)

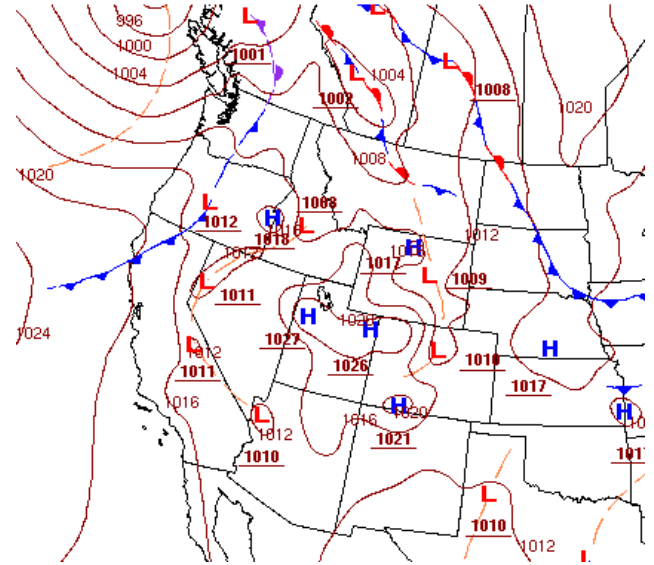

133 Figure S3. Averaged diurnal cycle of meteorological variables (modeled and measured) during  
134 29 January–8 February 2013. The shaded area on the plots depict the  $\pm\sigma$  (standard deviation) of  
135 the observed values; (a) Air temperature, (b) water vapor mixing ratio, (c) wind speed.

136

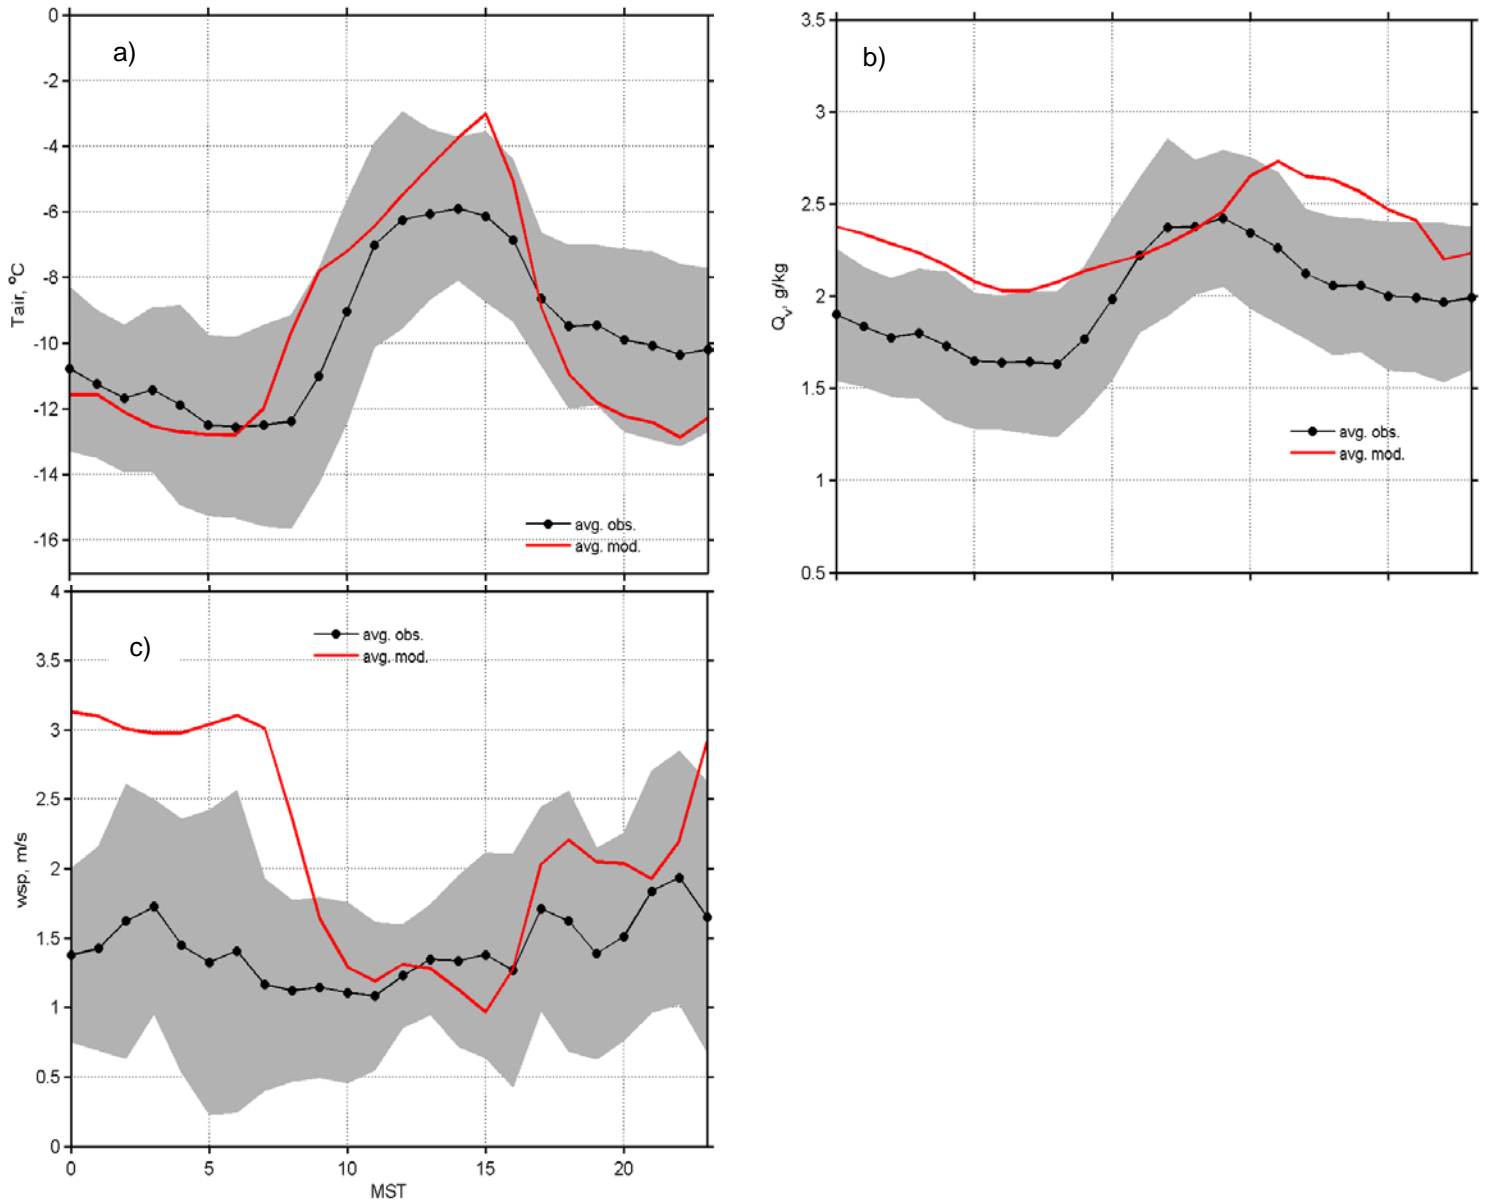

146

147

148 Figure S4. Wind roses showing direction and wind speed from both the measurements and model  
149 for 29 January–8 February 2013. The figures on left and right panels correspond to  
150 measurements and model results, respectively. The wind roses on the upper and lower rows  
151 correspond to nighttime and afternoon hours, respectively.

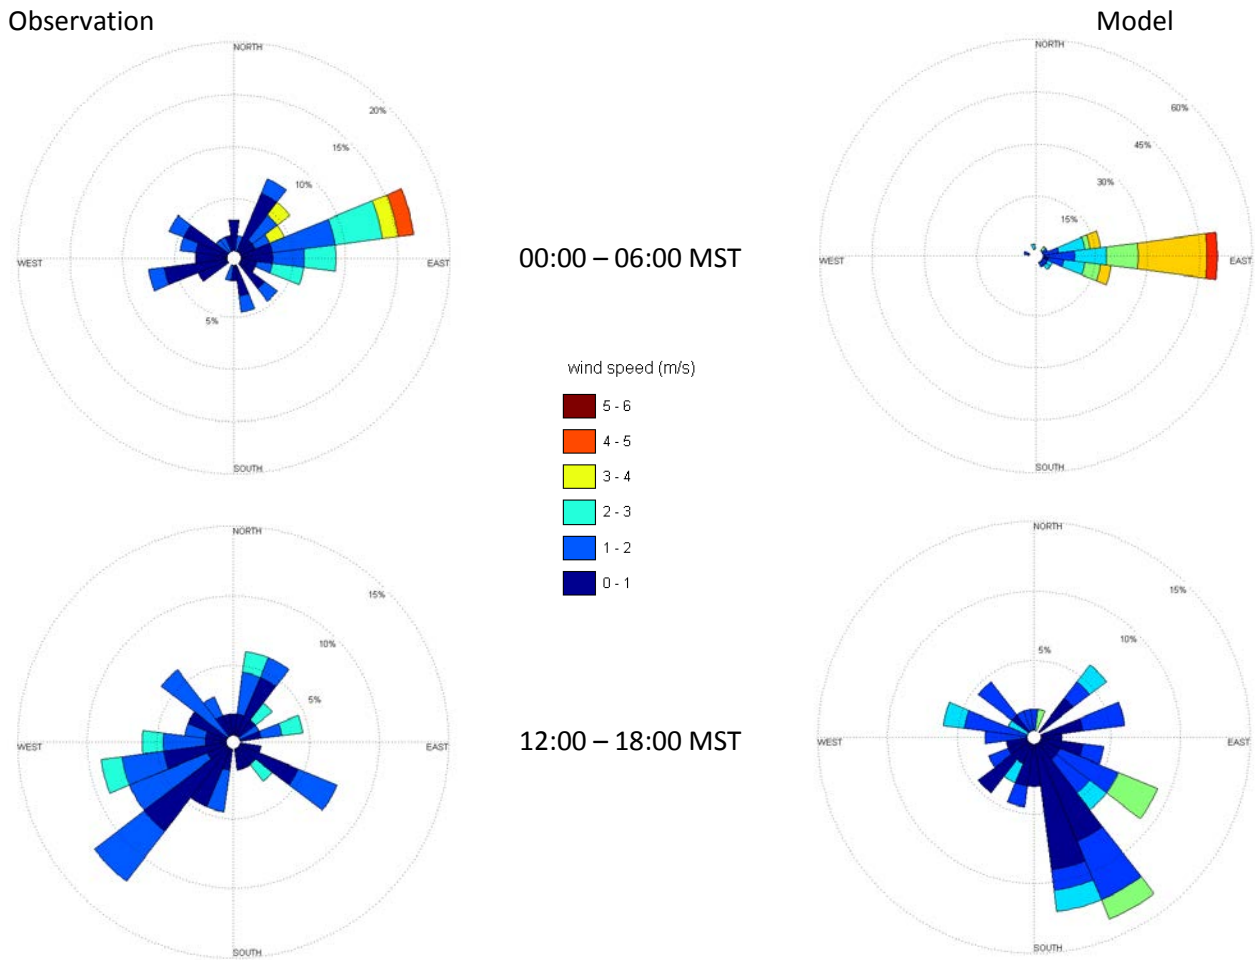

152 Figure S5. Mixing layer height estimates (3 hourly averaged) determined from vertical profiles  
153 of virtual potential temperature from the model output and tethered sonde measurements during  
154 daytime (09:00 -17:00 MST), 29 January–8 February 2013.

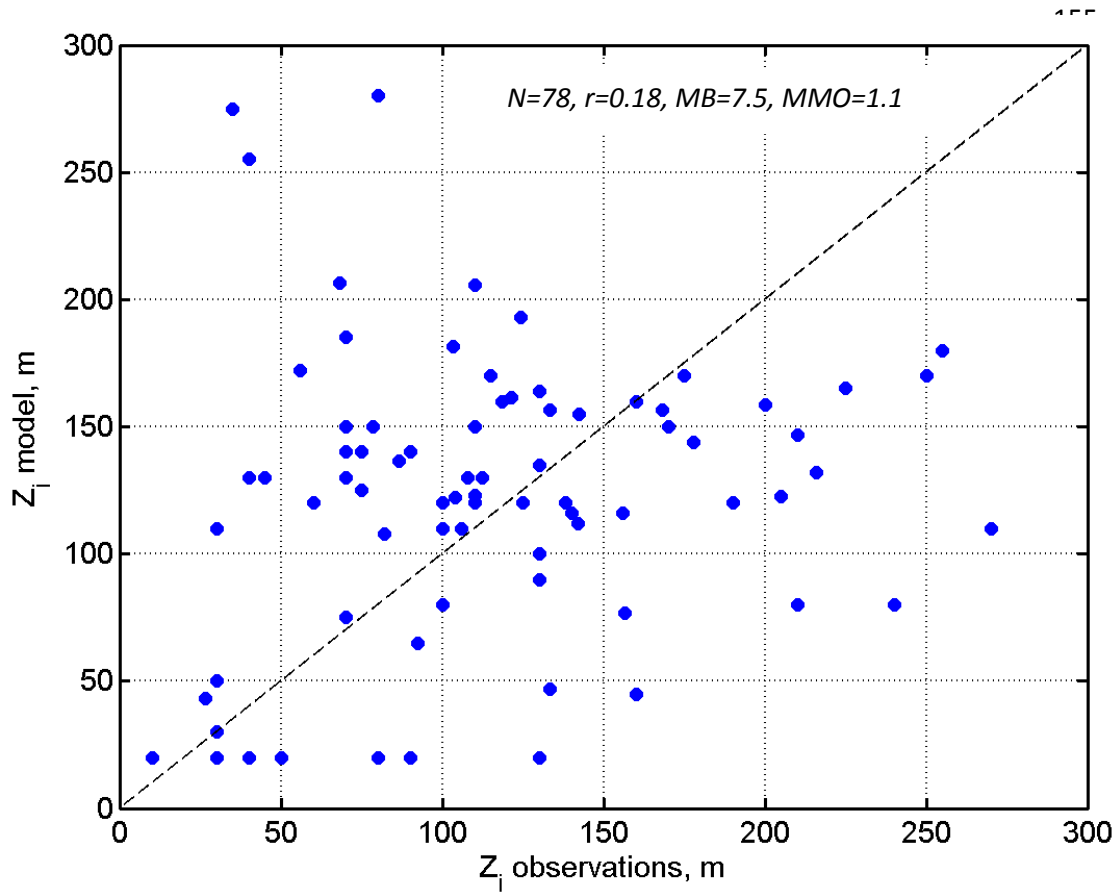

167

168

169

170

171

172

173

174

175 Figure S6. Time series of measured and modeled  $\text{NO}_y$ , methane ( $\text{CH}_4$ ) and toluene mixing ratios  
176 at Horse Pool in January-February, 2013.

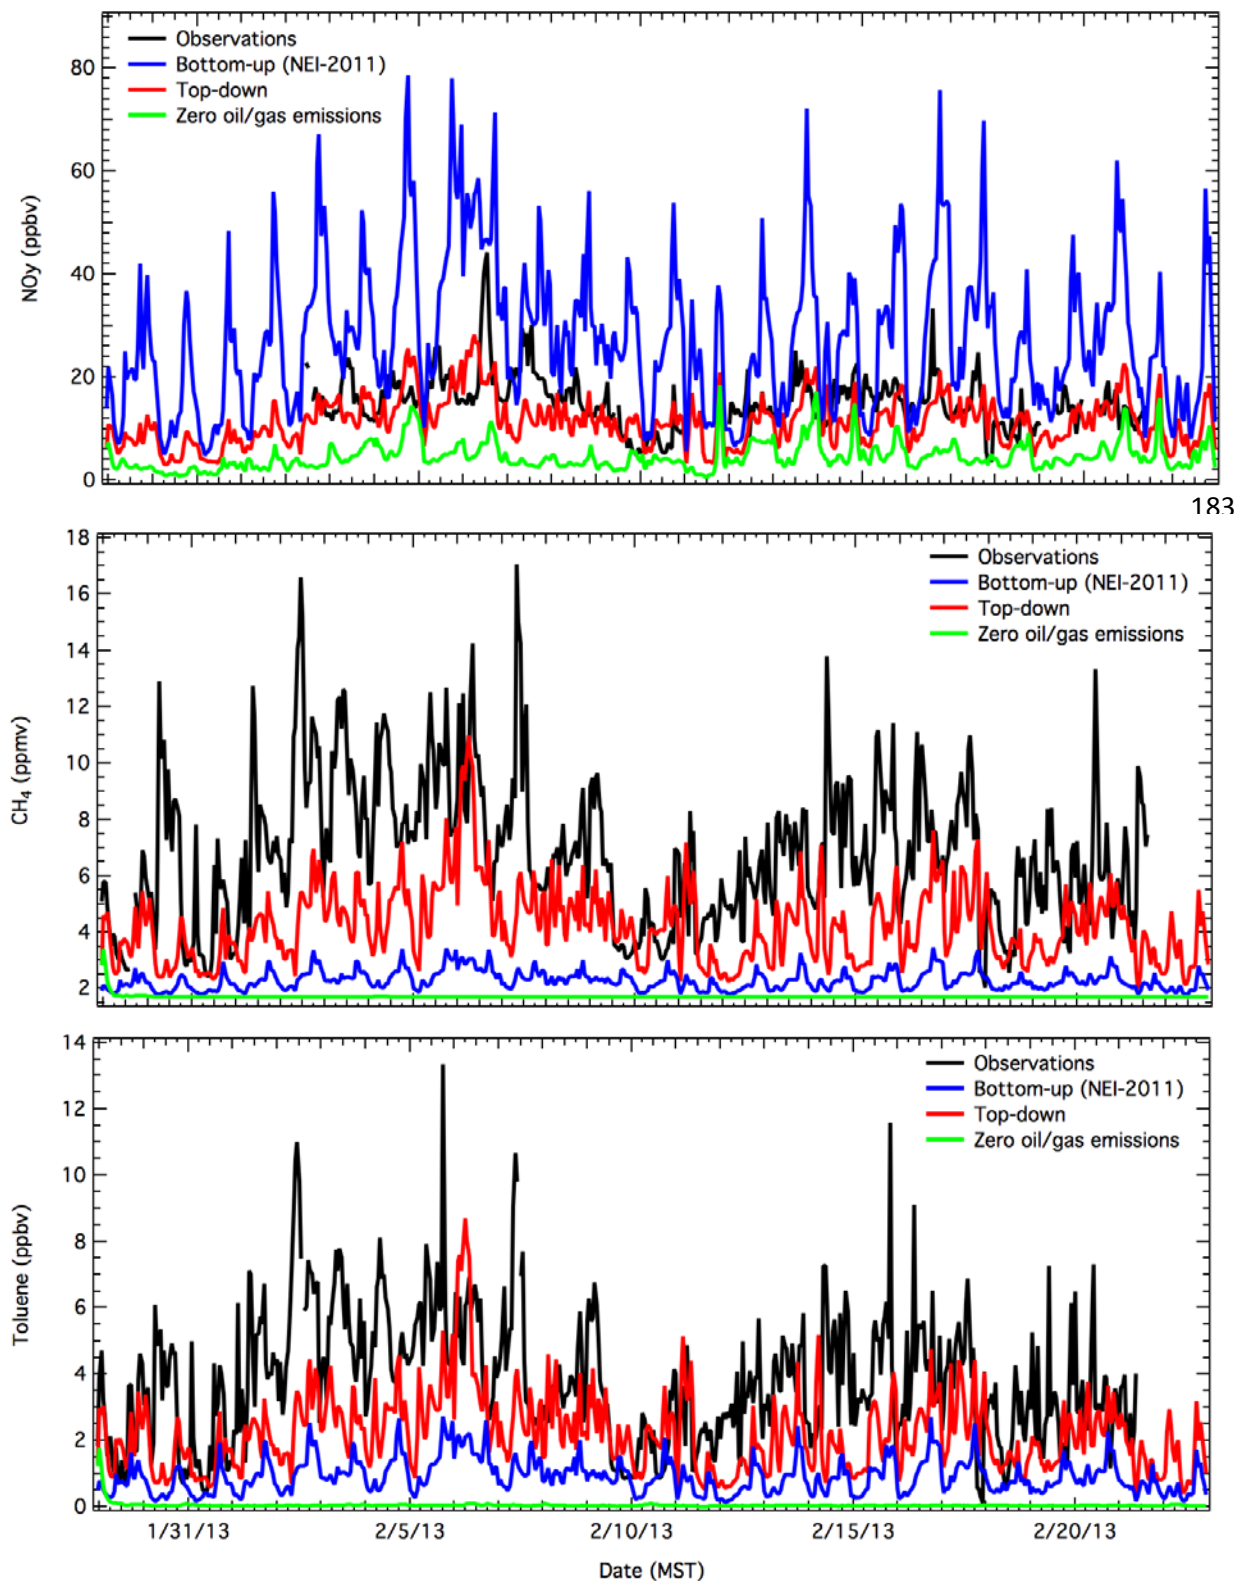

197 **References**

- 198 Carter, W. P. L.: Development of the SAPRC-07 chemical mechanism, *Atmos. Environ.*, 44,  
199 5324-5335, 10.1016/j.atmosenv.2010.01.026, 2010.
- 200 de Gouw, J., and Warneke, C.: Measurements of volatile organic compounds in the earth's  
201 atmosphere using proton-transfer-reaction mass spectrometry, *Mass Spectrometry Reviews*, 26,  
202 223-257, doi:210.1002/mas.20119, 2007.
- 203 Edwards, P. M., Young, C. J., Aikin, K., deGouw, J., Dube, W. P., Geiger, F., Gilman, J.,  
204 Helmig, D., Holloway, J. S., Kercher, J., Lerner, B., Martin, R., McLaren, R., Parrish, D. D.,  
205 Peischl, J., Roberts, J. M., Ryerson, T. B., Thornton, J., Warneke, C., Williams, E. J., and Brown,  
206 S. S.: Ozone photochemistry in an oil and natural gas extraction region during winter:  
207 simulations of a snow-free season in the Uintah Basin, Utah, *Atmos. Chem. Phys.*, 13, 8955-  
208 8971, 10.5194/acp-13-8955-2013, 2013.
- 209 Edwards, P. M., Brown, S., Roberts, J., Ahmadov, R., Banta, R., de Gouw, J., Dubé, W., Field,  
210 R., Flynn, J., Gilman, J., Graus, M., Helmig, D., Koss, A., Langford, A., Lefer, B., Lerner, B., Li,  
211 R., Li, S., McKeen, S., Murphy, S., Parrish, D., Senff, C., Soltis, J., Stutz, J., Sweeney, C.,  
212 Thompson, C., Trainer, M., Tsai, C., Veres, P., Washenfelder, R., Warneke, C., Wild, R., Young,  
213 C., Yuan, B., Zamora, R.: High winter ozone pollution from carbonyl photolysis in an oil and gas,  
214 *Nature*, 514, 351-354, 2014.
- 215 Gilman, J. B., Lerner, B. M., Kuster, W. C., and de Gouw, J. A.: Source Signature of Volatile  
216 Organic Compounds from Oil and Natural Gas Operations in Northeastern Colorado, *Environ.*  
217 *Sci. Technol.*, 47, 1297-1305, 10.1021/es304119a, 2013.
- 218 Grell, G. A., Peckham, S. E., Schmitz, R., McKeen, S. A., Frost, G., Skamarock, W. C., and  
219 Eder, B.: Fully coupled “online” chemistry within the WRF model, *Atmos. Environ.*, 39,  
220 6957–6975, doi:10.1016/j.atmosenv.2005.04.027, 2005.
- 221 Peischl, J., Ryerson, T. B., Holloway, J. S., Trainer, M., Andrews, A. E., Atlas, E. L., Blake, D.  
222 R., Daube, B. C., Dlugokencky, E. J., Fischer, M. L., Goldstein, A. H., Guha, A., Karl, T.,  
223 Kofler, J., Kosciuch, E., Misztal, P. K., Perring, A. E., Pollack, I. B., Santoni, G. W., Schwarz, J.  
224 P., Spackman, J. R., Wofsy, S. C., and Parrish, D. D.: Airborne observations of methane  
225 emissions from rice cultivation in the Sacramento Valley of California, *J. Geophys. Res.-Atmos.*,  
226 117, 10.1029/2012jd017994, 2012.

227 Stockwell, W. R., Kirchner, F., Kuhn, M., and Seefeld, S.: A new mechanism for regional  
228 atmospheric chemistry modeling, *J. Geophys. Res.-Atmos.*, 102, 25847-25879, 1997.

229 Warneke, C., Veres, P., Holloway, J. S., Stutz, J., Tsai, C., Alvarez, S., Rappenglueck, B.,  
230 Fehsenfeld, F. C., Graus, M., Gilman, J. B., and de Gouw, J. A.: Airborne formaldehyde  
231 measurements using PTR-MS: calibration, humidity dependence, inter-comparison and initial  
232 results, *Atmos. Meas. Tech.*, 4, 2345-2358, 10.5194/amt-4-2345-2011, 2011.

233 Wild, R., Edwards, P., Dube, W., Baumann, K., Edgerton, E., Quinn, P., Roberts, J., Rollins, A.,  
234 Veres, P., Warneke, C., Williams, E., Yuan, B., Brown, S.: A Measurement of Total Reactive  
235 Nitrogen, NO<sub>y</sub>, together with NO<sub>2</sub>, NO, and O<sub>3</sub> via Cavity Ring-down Spectroscopy, *Environ.*  
236 *Sci. Technol.*, 48, 9609-9615, 10.1021/es501896w, 2014.

237 Williams, E. J., Lerner, B. M., Murphy, P. C., Herndon, S. C., and Zahniser, M. S.: Emissions of  
238 NO<sub>x</sub>, SO<sub>2</sub>, CO, and HCHO from commercial marine shipping during Texas Air Quality Study  
239 (TexAQS) 2006, *J. Geophys. Res.-Atmos.*, 114, 10.1029/2009jd012094, 2009.
